# Supplementary material for: Body Size Predicts Echolocation Call Peak Frequency Better than Gape Height in Vespertilionid Bats
Source: PubMed Central journal article supplement (PMC5429766; doi:10.1038/s41598-017-00959-2), 2017-04-11
Supplement: 41598_2017_959_MOESM1_ESM.pdf [file 41598_2017_959_MOESM1_ESM.pdf]

Supplementary Table S1 for *NPG Scientific Reports* research article:

**Body Size Predicts Echolocation Call Peak Frequency Better than Gape  
Height in Vespertilionid Bats**

Authors:

Jenei Thiagavel, Sharlene E. Santana, and John M. Ratcliffe

SupplementaryTable S1. Size and call parameters for the vespertilionid species used in the study (N=86)

| Species                          | Peak Frequency (kHz) | Mass (g) | Gape height (mm) | Forearm Length (mm) |
|----------------------------------|----------------------|----------|------------------|---------------------|
| <i>Antrozous pallidus</i>        | 44.76                | 22.24    | 20.9             | 53.93               |
| <i>Barbastella barbastellus</i>  | 35.33                | 8.31     | 14.02            | 37.37               |
| <i>Chalinolobus gouldii</i>      | 29.39                | 14.24    | 16.44            |                     |
| <i>Chalinolobus morio</i>        | 52.92                | 8.91     | 11.5             | 40.75               |
| <i>Eptesicus brasiliensis</i>    | 34.86                | 9.2      | 16.92            | 39.1                |
| <i>Eptesicus diminutus</i>       | 40.85                | 5.99     | 14.59            |                     |
| <i>Eptesicus furinalis</i>       | 42.84                | 7.7      | 16.92            | 37.88               |
| <i>Eptesicus fuscus</i>          | 32.55                | 17.49    | 21.97            | 45.86               |
| <i>Eptesicus hottentotus</i>     | 30.88                | 30.33    | 21.72            | 47.57               |
| <i>Eptesicus nilssoni</i>        | 28.55                | 10.72    | 16.61            | 39.07               |
| <i>Eptesicus serotinus</i>       | 31.17                | 23.09    | 25.33            | 52.8                |
| <i>Euderma maculatum</i>         | 10.5                 | 16.17    | 14.08            | 50.29               |
| <i>Hesperoptenus tickelli</i>    | 30.69                | 16.3     | 21.68            | 56.43               |
| <i>Histiotus macrotus</i>        | 35.84                | 11       | 17.94            | 48.1                |
| <i>Idionycteris phyllotis</i>    | 20.37                | 12.13    | 13.88            | 47.02               |
| <i>Laephotis wintoni</i>         | 23.08                | 6.1      | 17.93            |                     |
| <i>Lasionycteris noctivagans</i> | <b>30.19</b>         | 11.02    | 17.93            | 40.79               |
| <i>Lasiurus borealis</i>         | 40.95                | 12.33    | 13.63            | 37.02               |
| <i>Lasiurus cinereus</i>         | 23.9                 | 27.06    | 17.26            | 47.22               |
| <i>Lasiurus ega</i>              | 32.2                 | 12.2     | 15.45            |                     |
| <i>Lasiurus intermedius</i>      | 36.18                | 22.96    | 17.37            | 49.82               |
| <i>Lasiurus seminolus</i>        | 40.13                | 9.88     | 12.18            | 43.15               |
| <i>Murina suilla</i>             | 124.14               | 4        | 15.18            |                     |
| <i>Myotis adversus</i>           | 46                   | 10.41    | 13.6             |                     |
| <i>Myotis albescens</i>          | 73.02                | 5.69     | 13.45            | 34.68               |
| <i>Myotis annectans</i>          | 47.51                | 9.75     | 17.27            | 35.52               |
| <i>Myotis auriculus</i>          | 49.6                 | 38.04    | 17.93            | 34.54               |
| <i>Myotis austroriparius</i>     | 48.23                | 7.35     | 15.82            | 39.36               |
| <i>Myotis bocagii</i>            | 41.26                | 7.93     | 17               | 34.59               |
| <i>Myotis brandtii</i>           | 49.27                | 5.3      | 16.56            | 34.3                |
| <i>Myotis californicus</i>       | 51.44                | 4.39     | 13.47            |                     |
| <i>Myotis chiloensis</i>         | 43.4                 | 8.41     | 14.12            |                     |
| <i>Myotis dasycneme</i>          | 39.43                | 15.16    | 18.31            |                     |
| <i>Myotis daubentonii</i>        | 46.98                | 7.63     | 14.64            | 37.69               |
| <i>Myotis elegans</i>            | 66.28                | 4.21     | 14.06            | 33.5                |
| <i>Myotis evotis</i>             | 52                   | 6.91     | 16.07            | 36.77               |
| <i>Myotis goudoti</i>            | 64.37                | 5.56     | 16.14            | 38.26               |
| <i>Myotis grisescens</i>         | 44.52                | 10.84    | 17.98            | 43.68               |
| <i>Myotis horsfieldii</i>        | 51.21                | 6.05     | 15.89            | 29.43               |
| <i>Myotis keaysi</i>             | 62.93                | 5.45     | 14.79            | 36.81               |
| <i>Myotis keenii</i>             | 59.67                | 6.51     | 14.74            | 35.47               |
| <i>Myotis leibii</i>             | 55.78                | 5.22     | 14.31            | 31.08               |
| <i>Myotis levis</i>              | 57.74                | 5.49     | 15.7             | 36.12               |
| <i>Myotis lucifugus</i>          | 47.39                | 7.8      | 14.99            | 38.38               |
| <i>Myotis macrotarsus</i>        | 42.82                | 12.64    | 21.75            | 43.08               |
| <i>Myotis muricola</i>           | 48.69                | 4.8      | 13.52            |                     |
| <i>Myotis myotis</i>             | 35.45                | 25.59    | 27.35            |                     |
| <i>Myotis mystacinus</i>         | 52.66                | 7.61     | 15.39            | 38.86               |
| <i>Myotis nattereri</i>          | 46.95                | 7.25     | 15.87            | 40.36               |
| <i>Myotis nigricans</i>          | 56.2                 | 5.53     | 13.58            | 34.44               |
| <i>Myotis ricketti</i>           | 40.52                | 26.19    | 24.35            | 37.32               |
| <i>Myotis riparius</i>           | 57.68                | 4.57     | 14.02            | 35.62               |
| <i>Myotis ruber</i>              | 62.49                | 4.99     | 15.1             | 37.85               |
| <i>Myotis septentrionalis</i>    | 49.93                | 5.4      | 16               | 35.91               |
| <i>Myotis simus</i>              | 57.74                | 8.1      | 13.84            | 36.43               |
| <i>Myotis sodalis</i>            | 51.42                | 7.15     | 14.8             | 38.13               |
| <i>Myotis thysanodes</i>         | 36.52                | 8.49     | 16.53            | 42.29               |
| <i>Myotis tricolor</i>           | 49.12                | 13.67    | 20.55            | 50.45               |
| <i>Myotis velifer</i>            | 43.44                | 9.82     | 17.75            | 43.33               |
| <i>Myotis volans</i>             | 46.39                | 8.71     | 14.77            | 40.25               |

|                                  |       |       |       |       |
|----------------------------------|-------|-------|-------|-------|
| <i>Myotis welwitschii</i>        | 32.66 | 15.88 | 22.6  |       |
| <i>Myotis yumanensis</i>         | 51.47 | 5.15  | 14.11 | 31.91 |
| <i>Nyctalus leisleri</i>         | 30.67 | 12.47 | 16.23 | 33.96 |
| <i>Nyctalus noctula</i>          | 22.86 | 28.48 | 22.26 | 49.58 |
| <i>Nycticeius humeralis</i>      | 42.82 | 9.12  | 14.07 | 33.57 |
| <i>Nyctophilus geoffroyi</i>     | 49.77 | 8.2   | 17.5  |       |
| <i>Pipistrellus javanicus</i>    | 47.51 | 4.92  | 12.97 |       |
| <i>Pipistrellus kuhlii</i>       | 41.16 | 6.07  | 14.53 | 30.84 |
| <i>Pipistrellus nathusii</i>     | 41.4  | 7.44  | 13.31 | 33.93 |
| <i>Pipistrellus pipistrellus</i> | 47.61 | 5.3   | 13.79 | 33.58 |
| <i>Pipistrellus subflavus</i>    | 45.95 | 5.74  | 12.47 | 32.62 |
| <i>Pipistrellus tenuis</i>       | 48    | 3.48  | 13.29 |       |
| <i>Plecotus auritus</i>          | 36.39 | 8.19  | 13.5  | 39.99 |
| <i>Plecotus austriacus</i>       | 29.66 | 6.75  | 13.23 | 40.83 |
| <i>Rhogeessa parvula</i>         | 57.57 | 4.37  | 11.11 | 27.23 |
| <i>Rhogeessa tumida</i>          | 48.65 | 4.58  | 12.62 | 28.83 |
| <i>Scotoecus hirundo</i>         | 36.86 | 8.45  | 16.95 | 34.9  |
| <i>Scotophilus dinganii</i>      | 36.38 | 25.12 | 19.44 | 53.04 |
| <i>Scotophilus heathii</i>       | 34.81 | 36.13 | 21.99 |       |
| <i>Scotophilus kuhlii</i>        | 38.94 | 20.31 | 17.53 | 51.32 |
| <i>Scotophilus leucogaster</i>   | 46.27 | 20.24 | 18.01 | 49.46 |
| <i>Scotophilus nigrita</i>       | 32.85 | 60    | 28.07 | 80.78 |
| <i>Scotophilus nux</i>           | 36.09 | 30    | 21.55 | 53.99 |
| <i>Scotophilus viridis</i>       | 40.1  | 19.81 | 17.01 | 46.17 |
| <i>Tylonycteris pachypus</i>     | 48.95 | 4.1   | 14.2  |       |
| <i>Tylonycteris robustula</i>    | 55    | 7.98  | 15.07 | 23.14 |
